# Supplementary material for: Resources and Costs for Microbial Sequence Analysis Evaluated Using Virtual Machines and Cloud Computing
Source: PLoS One. 2011 Oct 19;6(10):e26624. doi: 10.1371/journal.pone.0026624 (PMC3197577; doi:10.1371/journal.pone.0026624)
Supplement: Table S1 — Comparison of CloVR-16S runtimes executed locally and on Amazon EC2. (XLSX) [file pone.0026624.s002.xlsx]

## Sheet: Supplementary Table 1
Supplementary Table S1. Comparison of CloVR-16S runtimes executed locally and on Amazon EC2.
Dataset name	Sequence type	Sequencing platform	Capacity utilized	Library	Total Reads	Total bp	No. samples	Max. cluster size	Max No. of CPUs	Upload time	Pipeline runtime	Download time	Total Cost on EC2
Humanized mice	short PCR amplicon	454 FLX	~1/2 plate	multiplex	530030	122 Mb	215	1 (local)	1	0 min	2 hr 26 min	0 min	0
								1 (EC2, c1.xlarge)	8	41 min 55 sec	1 hr 30 min	11 min 41 sec	2.04
Infant gut 16S	short PCR amplicon	454 FLX	~1/2 plate	multiplex	399127	95 Mb	63	1 (local)	1	0 min	58 min 56 sec	0 min	0
								1 (EC2, c1.xlarge)	8	3 min 25 sec	41 min 46 sec	10 min 16 sec	0.68
Vaginal microbiome	short PCR amplicon	454 FLX	~1 plates	multiplex	901264	200 Mb	394	1 (local)	1	0 min	2 hr 27 min	0 min	0
								1 (EC2, c1.xlarge)	8	1 hr 17 min	1 hr 51 min	13 min 39 sec	2.72
Skin microbiome	short PCR amplicon	Sanger	108 plates (384-well)	single-read	41304	56 Mb	119	1 (local)	1	0 min	13 hr 59 min	0 min	0
								1 (EC2, c1.xlarge)	8	23 min 57 sec	10 hr 8 min	13 min 47 sec	7.48
