# Supplementary material for: Resources and Costs for Microbial Sequence Analysis Evaluated Using Virtual Machines and Cloud Computing
Source: PLoS One. 2011 Oct 19;6(10):e26624. doi: 10.1371/journal.pone.0026624 (PMC3197577; doi:10.1371/journal.pone.0026624)
Supplement: Table S3 — Runtime and cost comparisons of CloVR-Microbe executions on the same input dataset run with different Amazon EC2 cluster sizes. (XLSX) [file pone.0026624.s004.xlsx]

## Sheet: Supplementary Table 3
Supplementary Table S3. Runtime and cost comparisons of CloVR-Microbe executions on the same input dataset run with different Amazon EC2 cluster sizes.
Dataset name	Sequence type	Sequencing platform	Capacity utilized	Library	Total Reads	Total bp	No. samples	Max. cluster size	Max No. of CPUs	Upload time	Pipeline runtime	Download time	Total Cost on EC2
Escherichia coli 500k	WGS	454 FLX Titanium	1/2 plate	8kb paired-end	500000	184 Mb	1	local	1	0 min	~24 days (estimated)	0 min	0
								2	16	39 min 6 sec	56 hr 27 min	52 min 31 sec	74.12
								3	24	20 min 45 sec	37 hr 42 min	51 min 36 sec	64.6
								5	40	19 min 36 sec	27 hr 26 min	55 min 24 sec	57.12
								9	72	18 min 40 sec	23 hr 0 min	55 min 11 sec	57.8
								15	120	19 min 40 sec	20 hr 23 min	50 min 21 sec	59.84
								22	172	21 min 48 sec	20 hr 26 min	53 min 34 sec	82.28
